# Supplementary material
Source: PubMed Central journal article supplement (PMC10892903)
Supplement: NIHMS1963701-supplement-1.pdf [file NIHMS1963701-supplement-1.pdf]

**Supplementary Table 1.** Exclusion criteria in the National Alzheimer's Coordination Center Neuropathology Form

| Exclusion criteria                                                                                                                      | Variable name |
|-----------------------------------------------------------------------------------------------------------------------------------------|---------------|
| Down syndrome                                                                                                                           | NACCDOWN      |
| Pigment-spheroid degeneration/NBIA                                                                                                      | NPPDXA        |
| Multiple system atrophy                                                                                                                 | NPPDXB        |
| Trinucleotide disease (Huntington disease, SCA, other)                                                                                  | NPPDXD        |
| Malformation of cortical development                                                                                                    | NPPDXE        |
| Metabolic/storage disorder of any type                                                                                                  | NPPDXF        |
| White matter disease, leukodystrophy                                                                                                    | NPPDXG        |
| White matter disease, multiple sclerosis or other demyelinating disease                                                                 | NPPDXH        |
| Prion disease                                                                                                                           | NACCPRIO      |
| FTLD-tau                                                                                                                                | NPFTDTAU      |
| ALS/motor neuron disease (MND)                                                                                                          | NPALSMND      |
| CADASIL                                                                                                                                 | NPPATH10      |
| FTLD with TDP-43 pathology (FTLD-TDP)                                                                                                   | NPFTDTDP      |
| Other FTLD                                                                                                                              | NPOFTD        |
| FTLD-tau subtype – Pick's (PiD)                                                                                                         | NACCPICK      |
| FTLD-tau subtype — other 3R tauopathy (includes MAPT mutation tauopathy)                                                                | NPFTDT2       |
| FTLD-tau subtype — corticobasal degeneration (CBD)                                                                                      | NACCCBD       |
| FTLD-tau subtype — progressive supranuclear palsy (PSP)                                                                                 | NACCPROG      |
| FTLD-tau subtype — argyrophilic grains                                                                                                  | NPFTDT5       |
| FTLD-tau subtype — other 4R tauopathy (includes sporadic multiple systems tauopathy, globular glial tauopathy, MAPT mutation tauopathy) | NPFTDT6       |
| FTLD-tau subtype — chronic traumatic encephalopathy                                                                                     | NPFTDT7       |
| FTLD-tau subtype — amyotrophic lateral sclerosis (ALS)/parkinsonism-dementia                                                            | NPFTDT8       |
| FTLD-tau subtype — tangle dominant disease                                                                                              | NPFTDT9       |
| FTLD-tau subtype — other 3R + 4R tauopathy                                                                                              | NPFTDT10      |
| Frontotemporal dementia and parkinsonism with tau-positive or argyrophilic inclusions                                                   | NPFRONT       |
| Tauopathy, other (e.g., tangle-only dementia and argyrophilic grain dementia)                                                           | NPTAU         |
| FTD with ubiquitin-positive (tau-negative) inclusions                                                                                   | NPFTD         |

**Supplemental Table 2.** Sample numbers of ARTAG cases and controls from the ADRCs (N=20) that they were sourced from for the present study

| NACCADC | ARTAG    |       |
|---------|----------|-------|
|         | Controls | Cases |
| ADRC#1  | 27       | 9     |
| ADRC#2  | 14       | 7     |
| ADRC#3  | 3        | 6     |
| ADRC#4  | 16       | 6     |
| ADRC#5  | 1        | 2     |
| ADRC#6  | 9        | 15    |
| ADRC#7  | 20       | 11    |
| ADRC#8  | 11       | 11    |
| ADRC#9  | 7        | 25    |
| ADRC#10 | 28       | 16    |
| ADRC#11 | 39       | 13    |
| ADRC#12 | 7        | 3     |
| ADRC#13 | 10       | 7     |
| ADRC#14 | 2        | 2     |
| ADRC#15 | 3        | 10    |
| ADRC#16 | 28       | 17    |
| ADRC#17 | 7        | 28    |
| ADRC#18 | 37       | 23    |
| ADRC#19 | 1        | 4     |
| ADRC#20 | 12       | 7     |
| Total   | 282      | 222   |

**Supplementary Table 3.** Numbers of cases with ARTAG in amygdala and/or frontal cortex sections, and cases missing

| NPATGAMY<br>amygdala | NPATGFRN<br>frontal neocortex | n   |
|----------------------|-------------------------------|-----|
| No                   | No                            | 25  |
| No                   | Yes                           | 8   |
| Yes                  | No                            | 111 |
| Yes                  | Yes                           | 40  |
| Yes                  | Missing                       | 5   |
| Missing              | No                            | 2   |
| Missing              | Yes                           | 1   |
| Missing              | Missing                       | 30  |
| Total                |                               | 222 |

NPATGAMY=ARTAG in amygdala; NPATGFRN=ARTAG in frontal cortex
